# Supplementary material for: Early hypertension and neutropenia are predictors of treatment efficacy in metastatic colorectal cancer patients administered FOLFIRI and vascular endothelial growth factor inhibitors as second‐line chemotherapy
Source: PubMed Central journal article supplement (PMC7877370; doi:10.1002/cam4.3638), 2020-12-21
Supplement: CAM4-10-615-s001.pdf [file CAM4-10-615-s001.pdf]

(a)

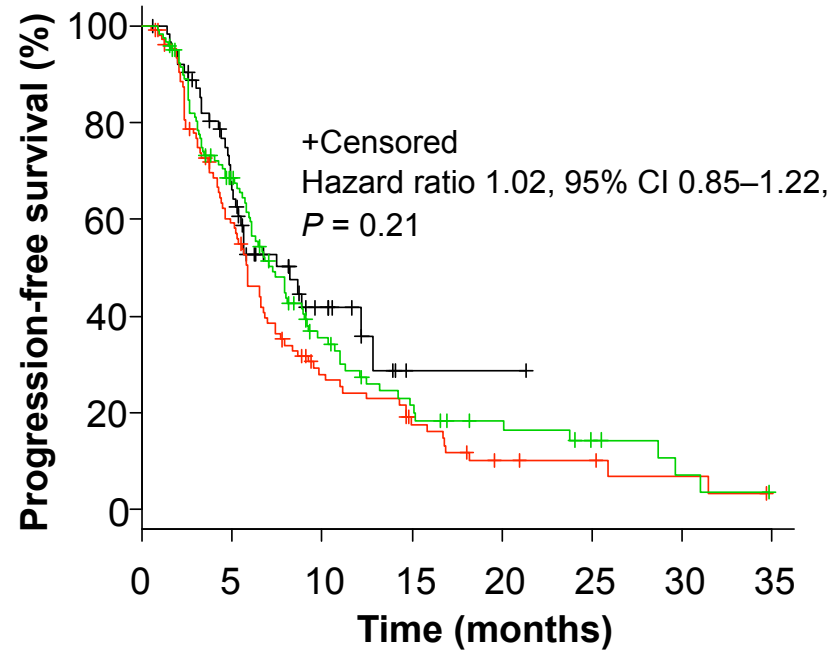

|               | <u>n</u> | <u>median</u> | <u>95% CI</u> |
|---------------|----------|---------------|---------------|
| — FOLFIRI+BEV | 119      | 7.2 months    | 6.0 to 9.0    |
| — FOLFIRI+RAM | 107      | 5.8 months    | 4.6 to 6.8    |
| — FOLFIRI+AFL | 63       | 8.2 months    | 5.2 to 12.8   |

(b)

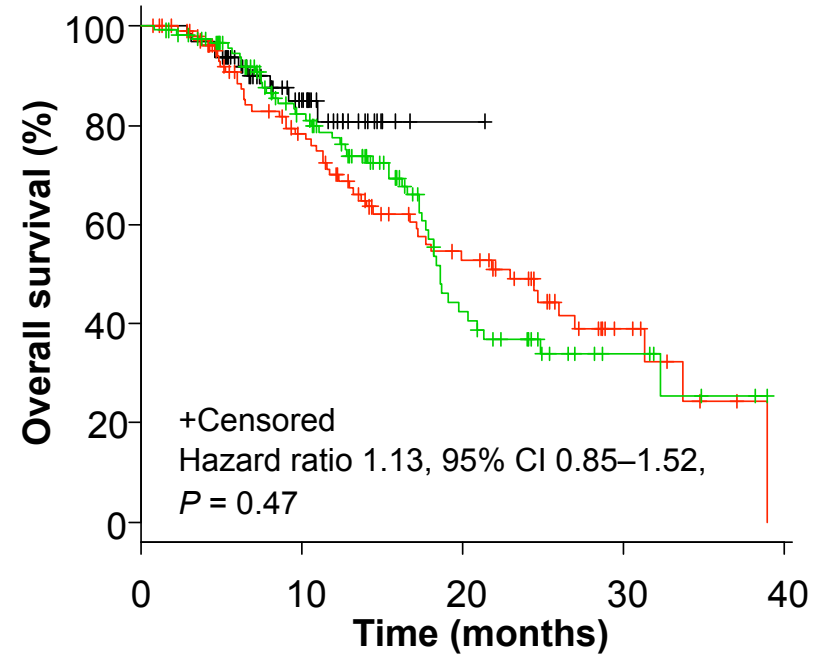

|               | <u>n</u> | <u>median</u> | <u>95% CI</u> |
|---------------|----------|---------------|---------------|
| — FOLFIRI+BEV | 119      | 18.6 months   | 17.4 to 21.3  |
| — FOLFIRI+RAM | 107      | 23.0 months   | 16.7 to 31.3  |
| — FOLFIRI+AFL | 63       | NA            | NA to NA      |
