# Supplementary material for: Early hypertension and neutropenia are predictors of treatment efficacy in metastatic colorectal cancer patients administered FOLFIRI and vascular endothelial growth factor inhibitors as second‐line chemotherapy
Source: PubMed Central journal article supplement (PMC7877370; doi:10.1002/cam4.3638), 2020-12-21
Supplement: CAM4-10-615-s002.pdf [file CAM4-10-615-s002.pdf]

(a) Non prior Bev Group

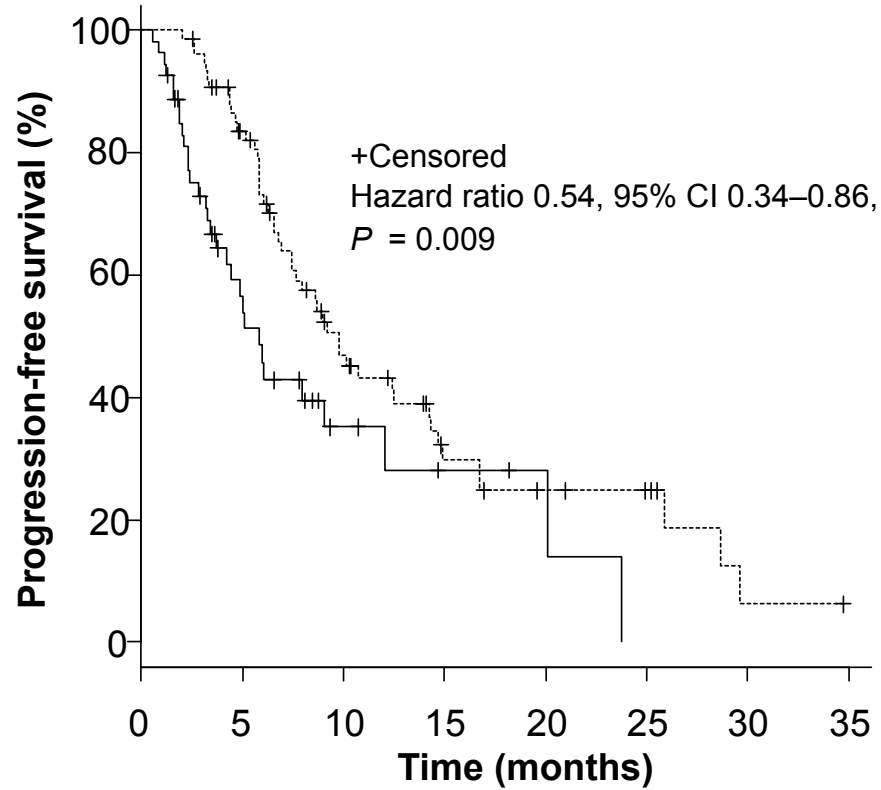

|                            | <u>n</u> | <u>median</u> | <u>95% CI</u> |
|----------------------------|----------|---------------|---------------|
| — G3/4 adverse event (-)   | 66       | 5.8 months    | 3.7 to 12.1   |
| ··· G3/4 adverse event (+) | 64       | 9.8 months    | 7.4 to 14.2   |

(b) Prior Bev Group

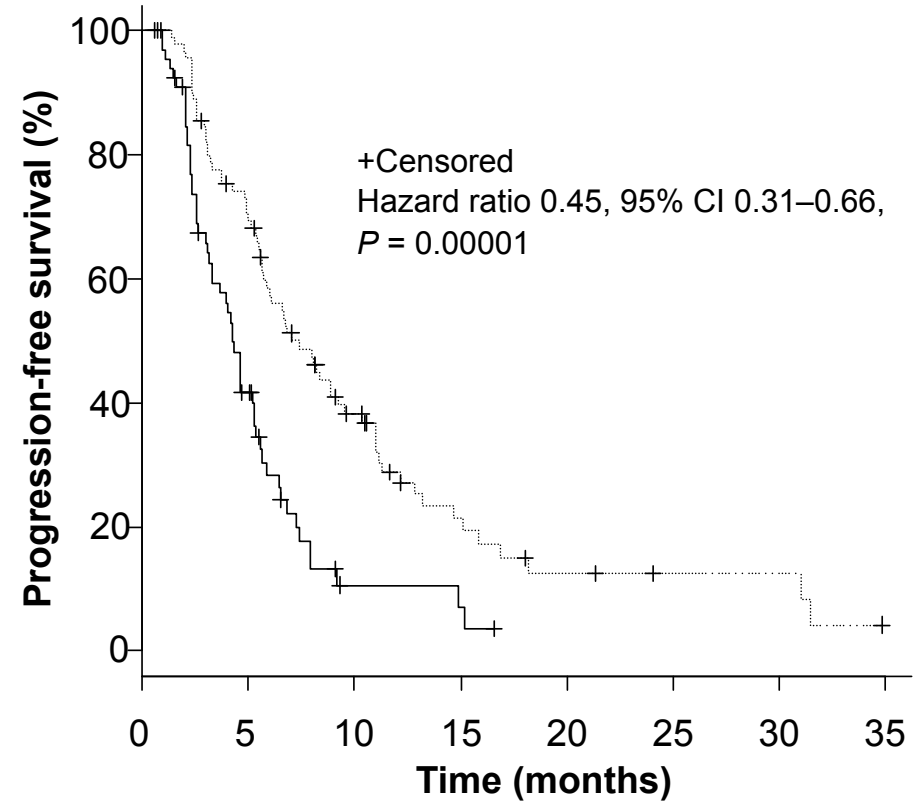

|                            | <u>n</u> | <u>median</u> | <u>95% CI</u> |
|----------------------------|----------|---------------|---------------|
| — G3/4 adverse event (-)   | 81       | 4.2 months    | 3.1 to 5.2    |
| ··· G3/4 adverse event (+) | 78       | 7.1 months    | 5.6 to 9.2    |
